# Supplementary material for: Two thousand years of atmospheric rare earth element (REE) deposition as revealed by an ombrotrophic peat bog profile, Jura Mountains, Switzerland
Source: Royal Society of Chemistry journal article supplement (doi:10.1039/b208355h), 2002-12-11

## Figure Caption - Electronic Supplementary Material

**Fig. I.** Concentration profiles of the 14 rare earth elements in the 2F core at Etang de la Gruère as determined by microwave digestion/ICP-MS.

a) La, Ce, Pr, Nd, Sm, Eu, Gd and Tb

b) Dy, Ho, Er, Tm, Yb and Lu

Figure 1a (ESI)

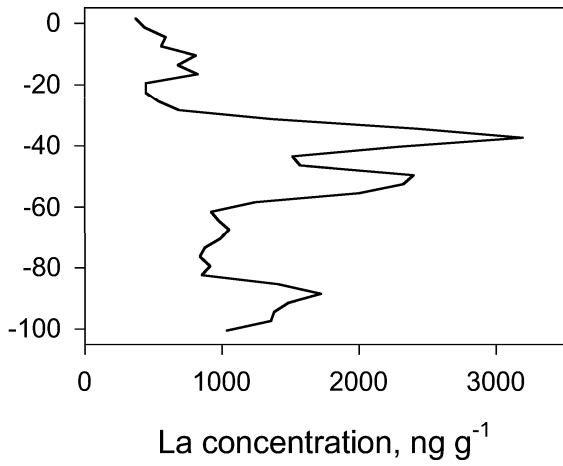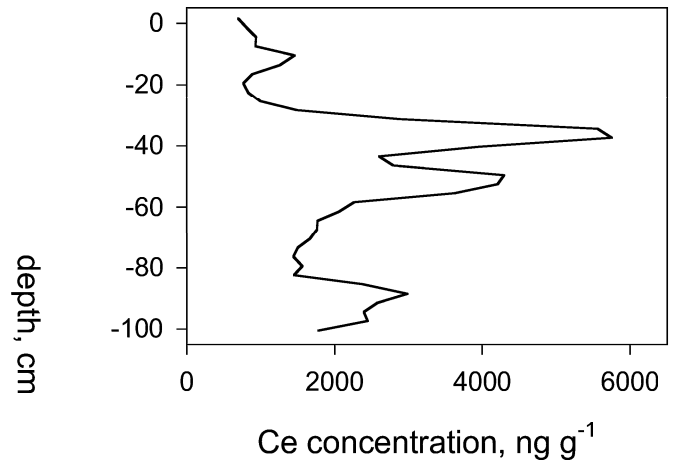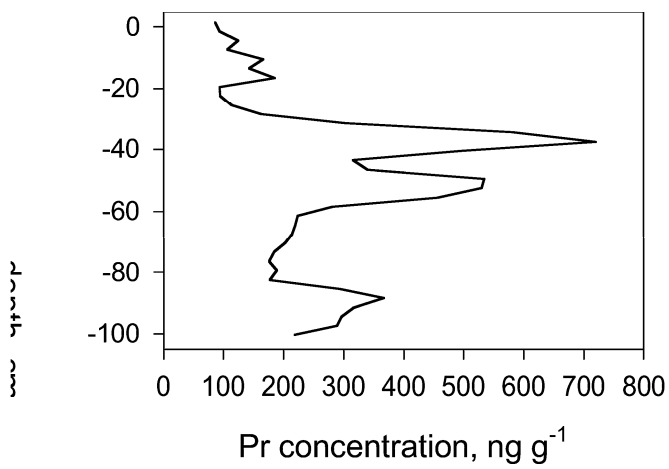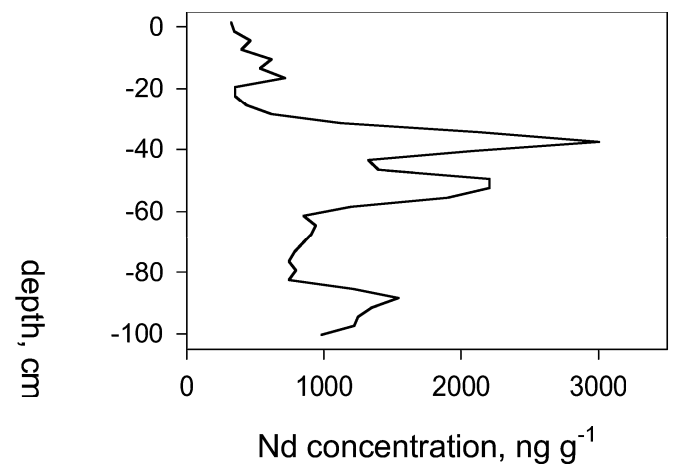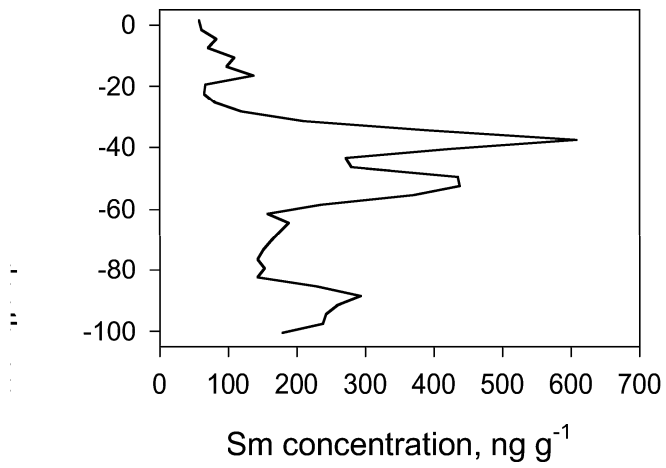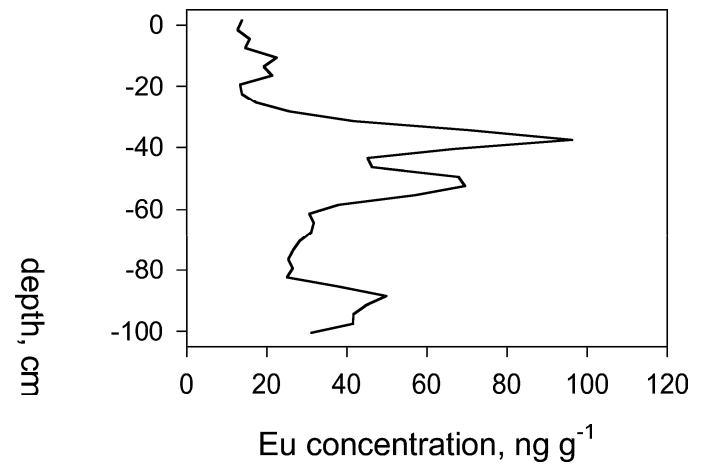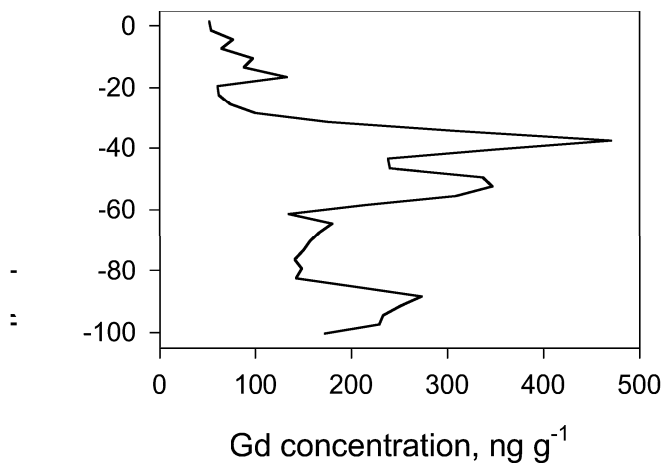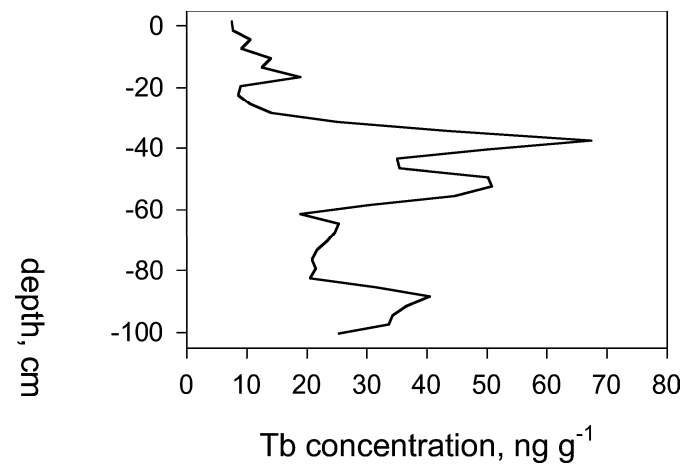

**Figure 1b (ESI)**

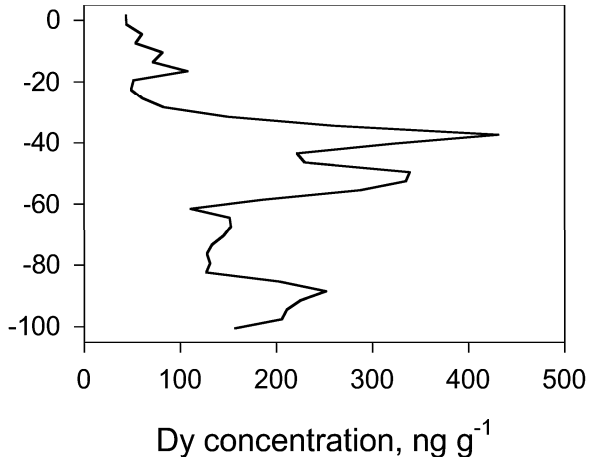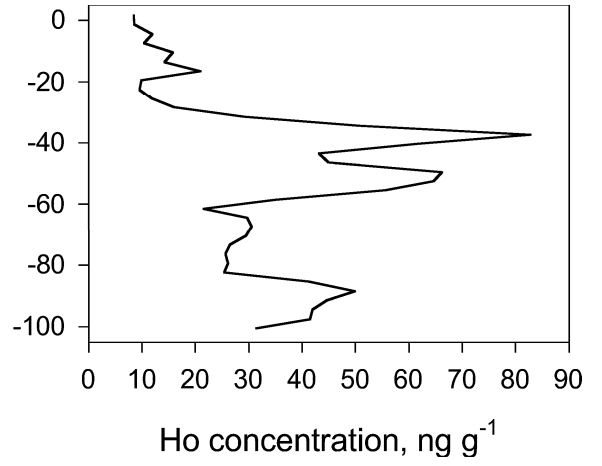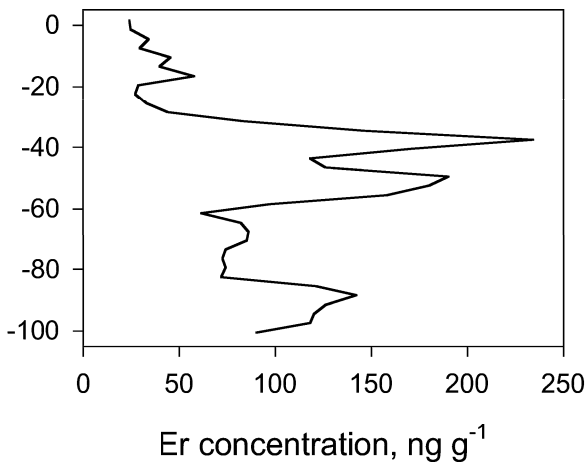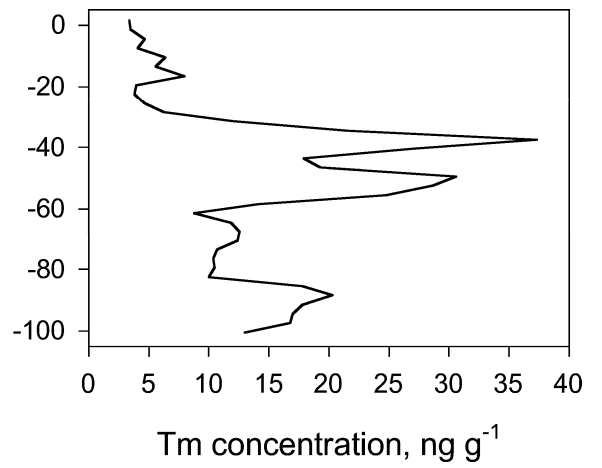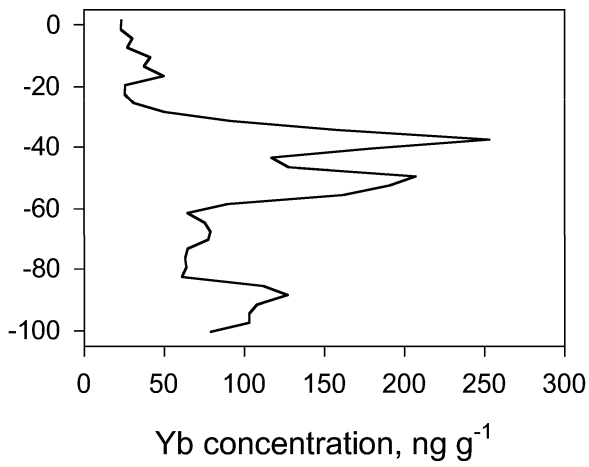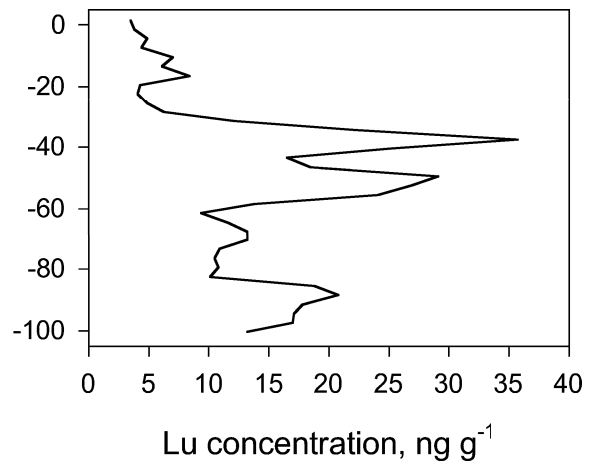

Supplement: figures.pdf [file figures.pdf]
